# Supplementary material for: High efficiency production of ferulic acid using feruloyl esterase and xylanase in deep eutectic solvents
Source: Royal Society of Chemistry journal article supplement (doi:10.1039/d3nj01500a), 2023-01-01
Supplement: d3nj01500a1.pdf [file d3nj01500a1.pdf]

Table S1 Prepared DES based on choline chloride.

| HBA                     | HBD                  | molar ratio |
|-------------------------|----------------------|-------------|
| Choline Chloride (ChCl) | Glycerol (Gly)       | 1:2         |
| ChCl                    | Urea (U)             | 1:2         |
| ChCl                    | Ethylene Glycol (EG) | 1:2         |
| ChCl                    | Lactic Acid (LA)     | 1:3         |
